# Supplementary material for: Regulation of Intronic Polyadenylation by PCF11 Impacts mRNA Expression of Long Genes
Source: PubMed Central journal article supplement — Cell Rep. Author manuscript; Available in PMC 2019 Mar 21. (PMC6428223; doi:10.1016/j.celrep.2019.02.049), 2019-03-05
Supplement: NIHMS1523290-supplement-1.pdf [file NIHMS1523290-supplement-1.pdf]

**Cell Reports, Volume 26**

**Supplemental Information**

**Regulation of Intronic Polyadenylation**

**by PCF11 Impacts mRNA Expression of Long Genes**

**Ruijia Wang, Dinghai Zheng, Lu Wei, Qingbao Ding, and Bin Tian**

## SUPPLEMENTARY MATERIALS

### Supplementary Tables

**Table S1. Sequencing data generated in this study, Related to STAR Methods.**

| GEO sample ID | Sequencing method | Sample description                                         |
|---------------|-------------------|------------------------------------------------------------|
| GSM3190450    | 3'READS           | Total RNA, proliferation sample, C2C12 cells, replicate 1  |
| GSM3190451    | 3'READS           | Total RNA, proliferation sample, C2C12 cells, replicate 2  |
| GSM3190452    | 3'READS           | Total RNA, differentiation, C2C12 cells, replicate 1       |
| GSM3190453    | 3'READS           | Total RNA, differentiation, C2C12 cells, replicate 2       |
| GSM3171721    | 3'READS           | 4sU labeled RNA, control sample, C2C12 cells, replicate 1  |
| GSM3171722    | 3'READS           | 4sU labeled RNA, control sample, C2C12 cells, replicate 2  |
| GSM3171723    | 3'READS           | Total RNA, control sample, C2C12 cells, replicate 1        |
| GSM3171724    | 3'READS           | Total RNA, control sample, C2C12 cells, replicate 2        |
| GSM3171725    | 3'READS           | 4sU labeled RNA, siPcf11 sample, C2C12 cells, replicate 1  |
| GSM3171726    | 3'READS           | 4sU labeled RNA, siPcf11 sample, C2C12 cells, replicate 2  |
| GSM3171727    | 3'READS           | Total RNA, siPcf11 sample, C2C12 cells, replicate 1        |
| GSM3171728    | 3'READS           | Total RNA, siPcf11 sample, C2C12 cells, replicate 2        |
| GSM3171729    | 3'READS           | Total RNA, 4T1 WT cells, replicate 1                       |
| GSM3171730    | 3'READS           | Total RNA, 4T1 WT cells, replicate 2                       |
| GSM3171731    | 3'READS           | Total RNA, 4T1 IPA <sup>Pcf11</sup> -KO cells, replicate 1 |
| GSM3171732    | 3'READS           | Total RNA, 4T1 IPA <sup>Pcf11</sup> -KO cells, replicate 2 |
| GSM3506180    | 3'READS           | Total RNA, control sample, NIH3T3 cells, replicate 1       |
| GSM3506181    | 3'READS           | Total RNA, control sample, NIH3T3 cells, replicate 2       |
| GSM3506182    | 3'READS           | Total RNA, siPcf11 sample, NIH3T3 cells, replicate 1       |
| GSM3506183    | 3'READS           | Total RNA, siPcf11 sample, NIH3T3 cells, replicate 2       |
| GSM3171746    | RNA-seq           | Total RNA, control sample, 3T3-L1 cells, replicate 1       |
| GSM3171747    | RNA-seq           | Total RNA, siPcf11 sample, 3T3-L1 cells, replicate 1       |

**Table S2. Real-time PCR primers used in this study, Related to STAR Methods.**

| <b>Gene Name (target region)</b>   | <b>Purpose</b>         | <b>Sequence</b>                                                                 |
|------------------------------------|------------------------|---------------------------------------------------------------------------------|
| <i>Pcf11</i> (exon 1 and intron 1) | IPA isoform expression | Forward: 5'-GCTGACCATTCTAGCCGAGGAGAA<br>Reverse: 5'-GAAGAATAGGAGGCTGCGGG        |
| <i>Pcf11</i> (exon 1 – exon2)      | Splicing of intron 1   | Forward: 5'-GGAAGAGAATATCTCACTGCCTT<br>Reverse: 5'-TGGAAGCTTCTCTGAGGAAGGA       |
| <i>Pcf11</i> (exon 2 – exon3)      | Gene expression        | Forward: 5'-GGAAGAGAATATCTCACTGCCTT<br>Reverse: 5'-GCAGAGGTTTAATAGGCCAAGC       |
| <i>Pcf11</i> (exon 12 – exon14)    | Gene expression        | Forward: 5'- GCAAAACAGAACCGAGAAAGA<br>Reverse: 5'- TGTTCTTGACAGATTTCAACAATC     |
| <i>Pcf11</i> (exon 15 – exon16)    | Gene expression        | Forward: 5'-ACCATCCATCATGTTATGAAGATTATCA<br>Reverse: 5'-TGCAATTCGTTTTTGACAATGTT |
| <i>Fgf2</i>                        | IPA isoform expression | Forward: 5'-AAACAGGAACCGGAAGTGCAT<br>Reverse: 5'-ATACCCCATCACTGTCCCTTG          |
| <i>Fgf2</i>                        | TPA isoform expression | Forward: 5'-CTTCACGGAACCTCAGCTGCTA<br>Reverse: 5'-TAGGGTAGCATACTTGGCG           |
| <i>Cstf3</i>                       | TPA isoform expression | Forward: 5'-ACAAGTGGATGAGCTGATGGAA<br>Reverse: 5'-CTGAATCCTCGTTGGGCCTT          |
| <i>Cstf3</i>                       | IPA isoform expression | Forward: 5'-ATAGACAAAGCACGGAAGACT<br>Reverse: 3'-GTGTAAGCTGTAATTGCCATC          |
| <i>CYPH</i>                        | Gene expression        | Forward: 5'-ATGGTCAACCCACCGTGT<br>Reverse: 5'-TTCCTGCTGTCTTTGGAACCTTGTGTC       |
| <i>GAPDH</i>                       | Gene expression        | Forward: 5'-TCACCACCATGGAGAAGGC<br>Reverse: 5'-GCTAAGCAGTTGGTGGTGCA             |

**Table S3. Other primers used in this study, Related to STAR Methods.**

| <b>Purpose</b>                                                      | <b>Sequence</b>                                                                                |
|---------------------------------------------------------------------|------------------------------------------------------------------------------------------------|
| PCR and Sanger sequencing to validate IPA site KO                   | Forward: 5'-GGGTATAGGGAATTGGCCCC<br>Reverse: 5'-ACTGTGTGGGGGCAAACCTATT                         |
| sgRNA cloning, upstream of <i>Pcf11</i> IPA site                    | Forward: 5'-CACCGACCGTCTCTAAACAACATAT<br>Reverse: 5'-AAACATATGTTGTTTAGAGACGGTC                 |
| sgRNA cloning, downstream of <i>Pcf11</i> IPA site                  | Forward: 5'-CACCGCTGCTTCACAGGCATTTCGAC<br>Reverse: 5'-AAACGTCGAATGCCTGTGAAGCAGC                |
| <i>Pcf11</i> IPA site strength analysis                             | Forward: 5'-ATATATCTCGAGGCAGAGTGAACCCCTT<br>Reverse: 5'-CCGGAATTCCACACAACCACAAAAGT             |
| <i>Pcf11</i> proximal 3'UTR PAS strength analysis                   | Forward: 5'-ATATATCTCGAGCCTTCAGCTATCATTTGG<br>Reverse: 5'-CCGGAATTCATCATGTTAAGATTGCTGTTC       |
| <i>Pcf11</i> 3'UTR distal PAS strength analysis                     | Forward: 5'-ATATATCTCGAGGGTTTTGATTGAATTAGATGGG<br>Reverse: 5'-CCGGAATTCCTGGGAGTATGGCTCATAACT   |
| Control ( <i>Pcf11</i> intron 1 sequence) for PAS strength analysis | Forward: 5'-ATATATCTCGAGAGTTTTTGAGCACATGTTTCCT<br>Reverse: 5'-CCGGAATTCCAAGTGAAGTCCTTCCATGTAAT |

**Figure S1**

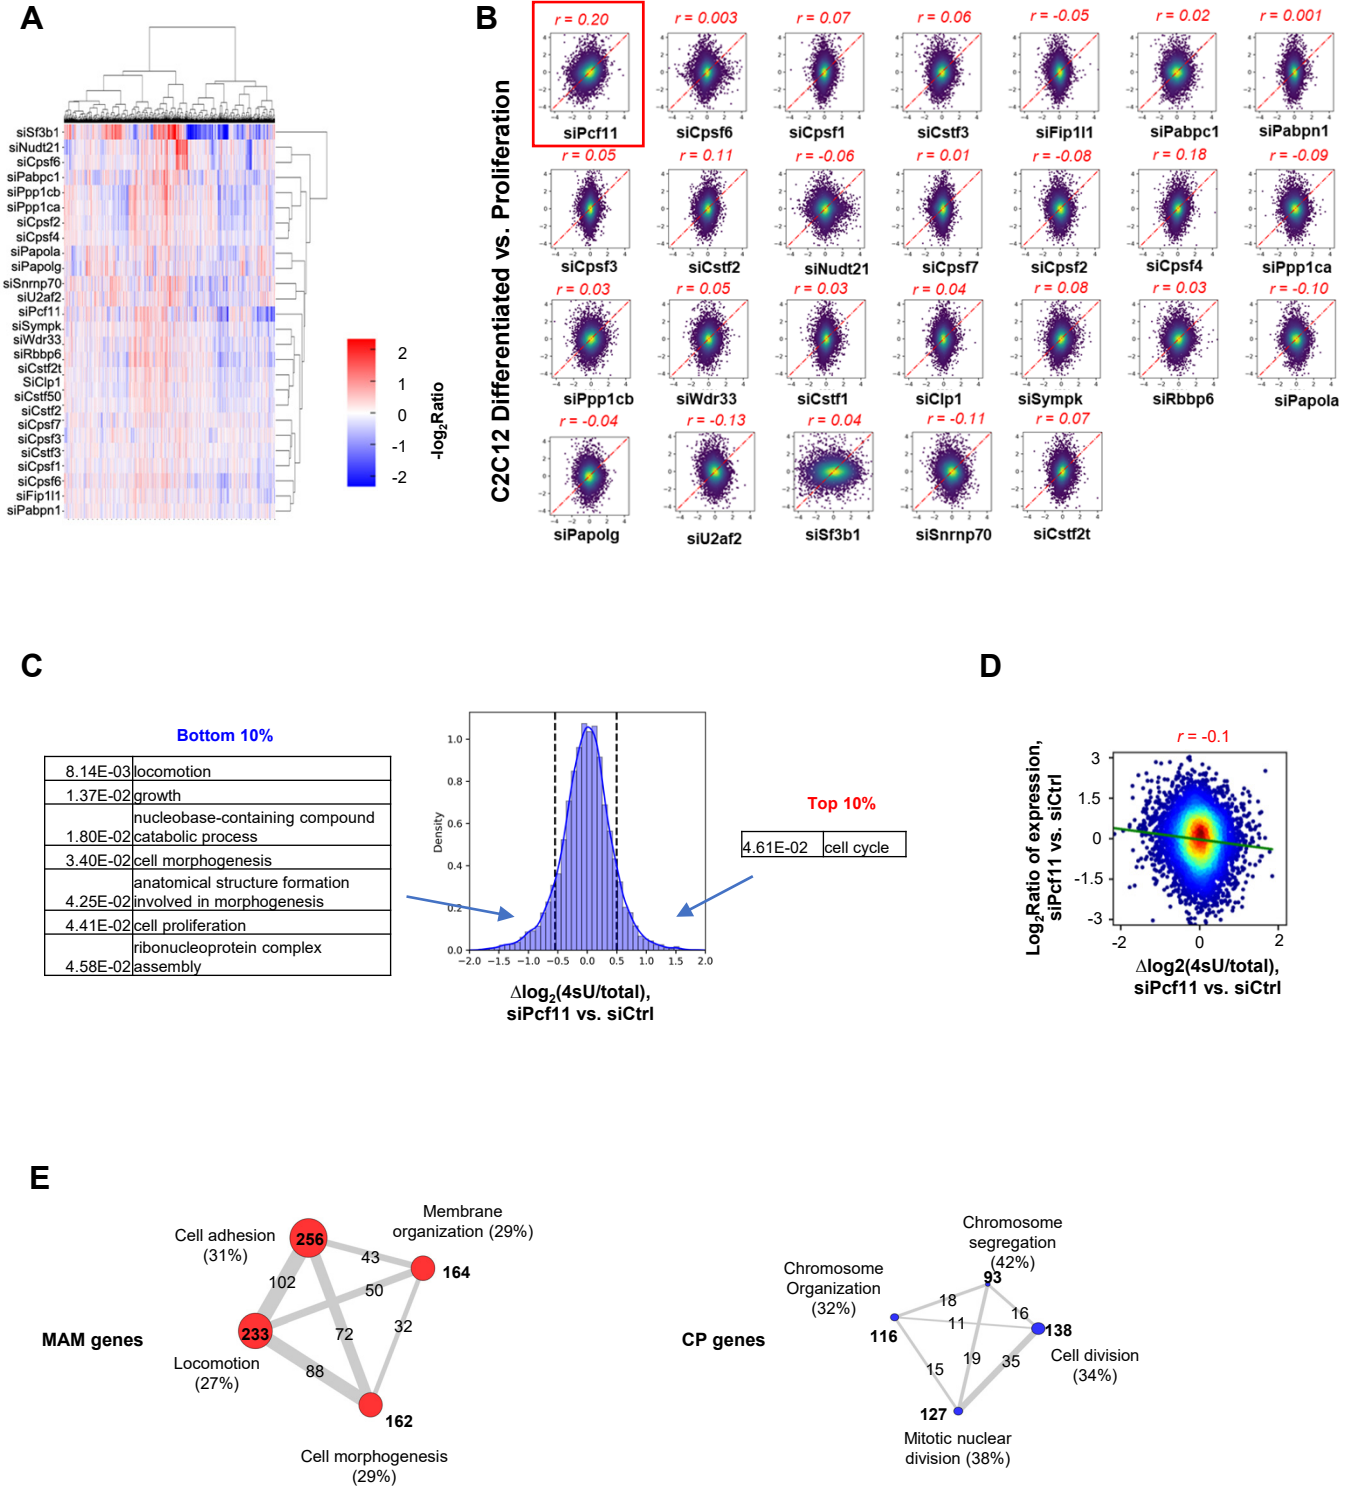

**Figure S1, Related to Figure 1.**

**(A)** Heatmap of gene expression changes by various KDs. Only significantly regulated genes in at least one KD sample are shown. Genes and samples were clustered based on Pearson Correlation. Replicates were combined.

**(B)** Correlation of gene expression changes in KD cells and those in C2C12 differentiation. siPcf11 sample is highlighted.

**(C)** Distribution of  $\log_2(4sU/total)$  difference between siPcf11 and siCtrl samples. The data are based on two replicates. GO terms enriched for the top and bottom 10% of genes are indicated. A high  $\Delta\log_2(4sU/total)$  value indicates mRNA destabilization, whereas a low value stabilization.

**(D)** Correlation between  $\Delta\log_2(4sU/total)$  and expression change by *Pcf11* KD.

**(E)** Two GO term groups (MAM and CP) associated with regulated genes. For each group, the number of upregulated (MAM group) or downregulated genes (CP group) associated with each GO term is indicated, and number of overlap genes between GO terms is indicated on the edge connecting them. Percentage values indicate percent of genes shared with other GO terms in the group.

Figure S2

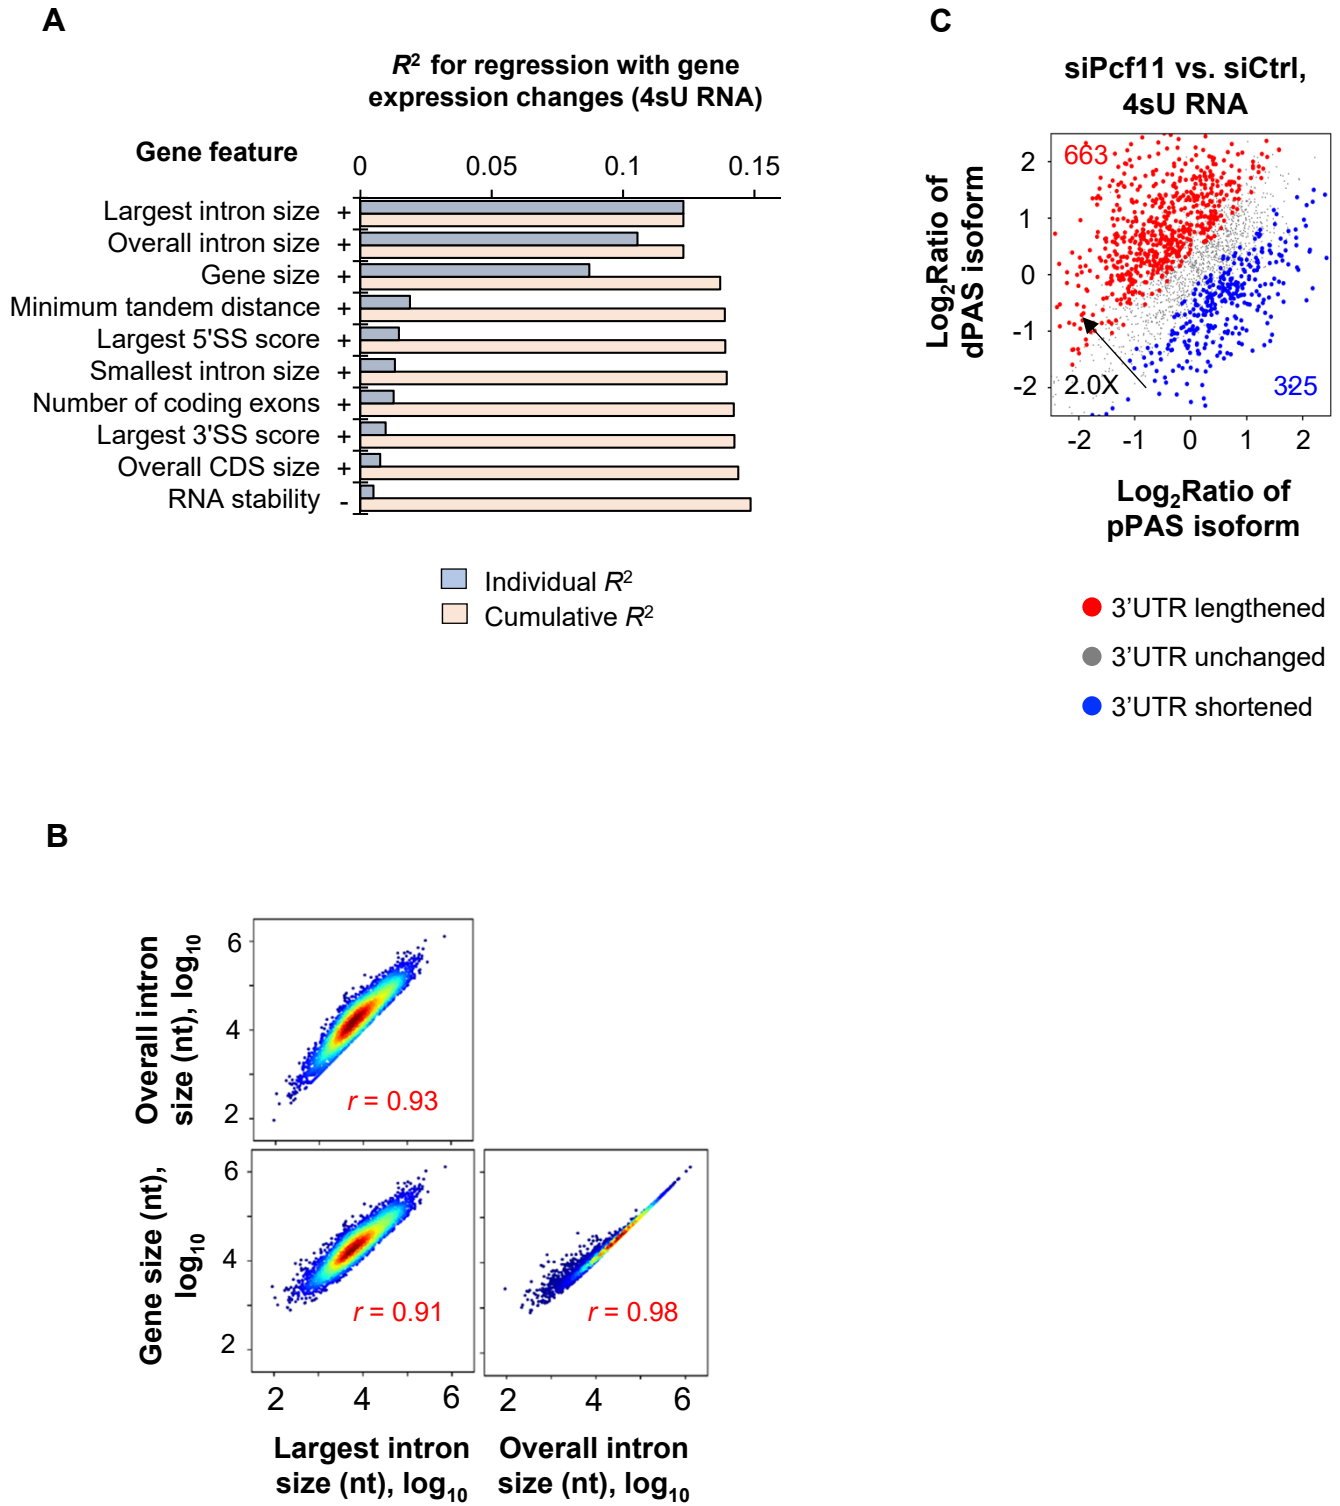

**Figure S2, Related to Figure 2.**

**(A)** Summary of regression analysis of different gene features vs. gene expression changes in *Pcf11* KD cells. Expression data are based on 4sU-labeled RNA. Top features are sorted according to individual  $R^2$ . Cumulative  $R^2$  for a feature is based on the feature and all other features with a better individual  $R^2$ . '+', positive correlation; "-", negative correlation.

**(B)** Correlations among the size of largest intron, gene size and overall intron size. Pearson correlation coefficient ( $r$ ) is indicated.

**(C)** 3'UTR APA changes in *Pcf11* KD cells (4sU-labeled RNA). The numbers of genes with significantly lengthened 3'UTRs (red) or shortened 3'UTRs (blue) are indicated.



Figure S3

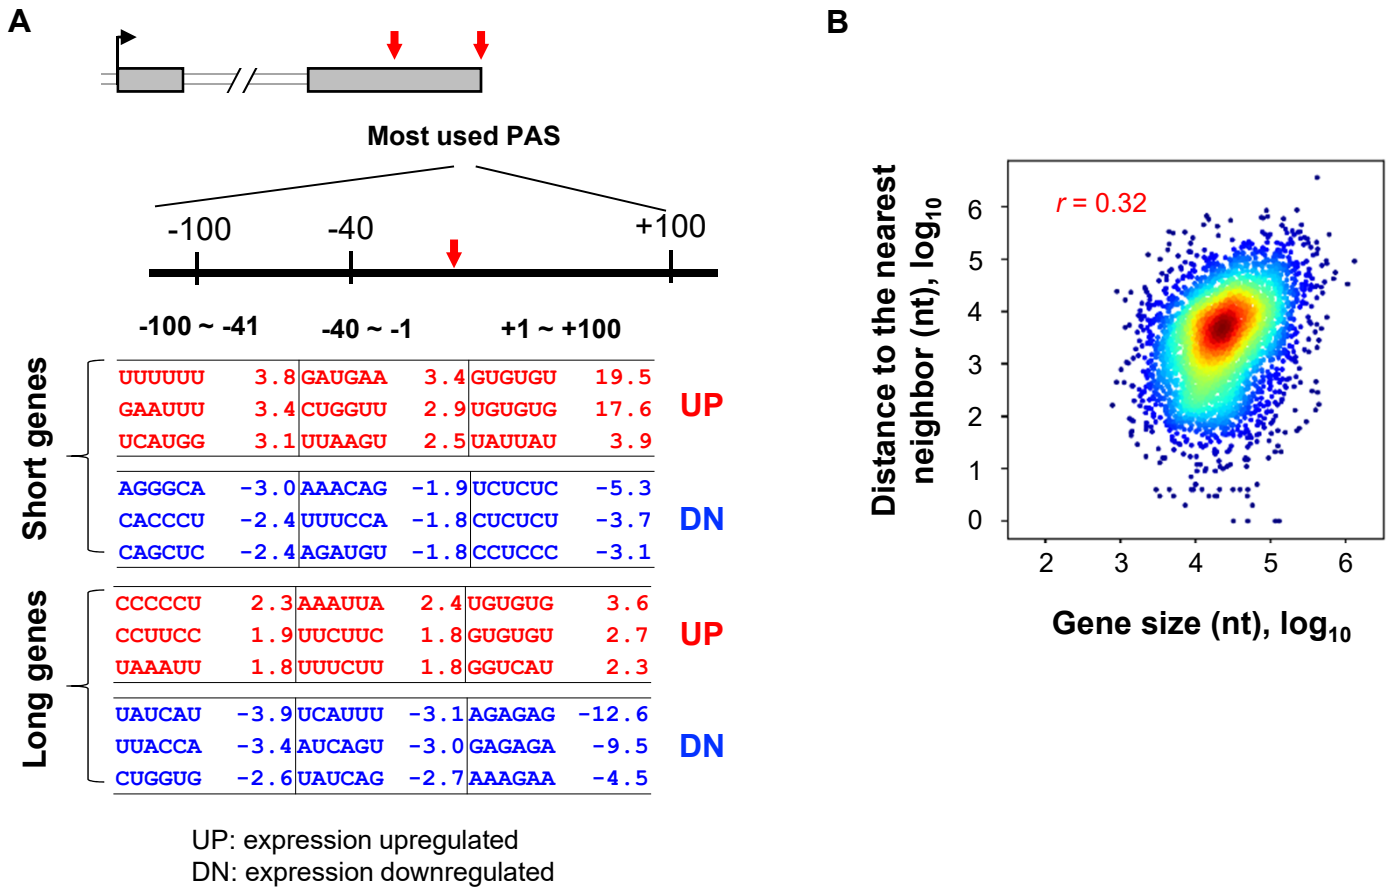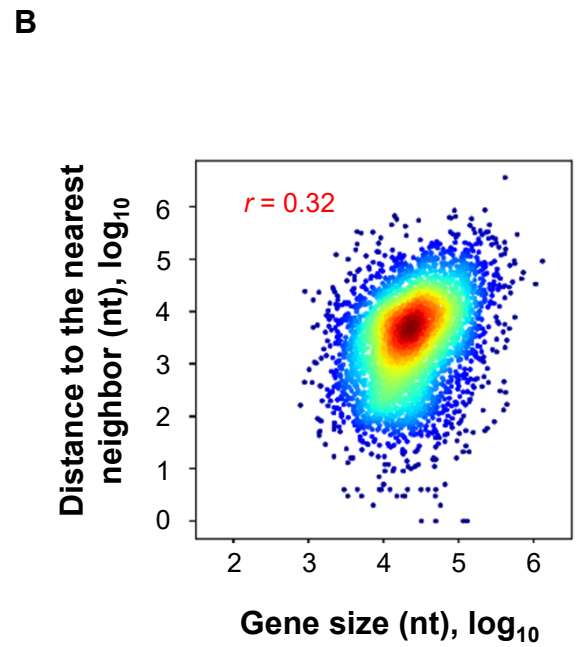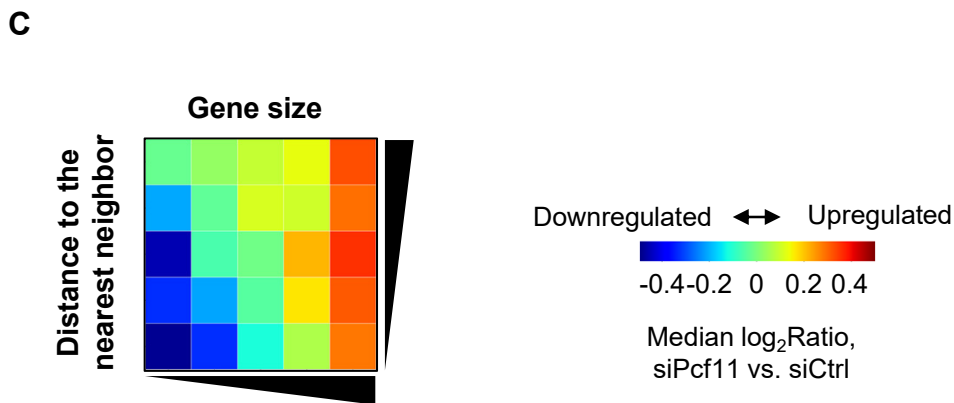

**Figure S3, Related to Figure 3.**

**(A)** Enriched motifs around the PAS for upregulated or downregulated genes in short and long gene groups. The most used PAS in the 3'-most exon of each gene based on 3'READS read count is used for analysis.

**(B)** Correlation between gene size and distance to the nearest neighbor. Pearson correlation coefficient ( $r$ ) is indicated.

**(C)** Heatmap showing gene expression change (median  $\log_2$ Ratio, siPcf11 vs. siCtrl) in gene groups based on gene size and distance to the nearest neighbor.

Figure S4

A

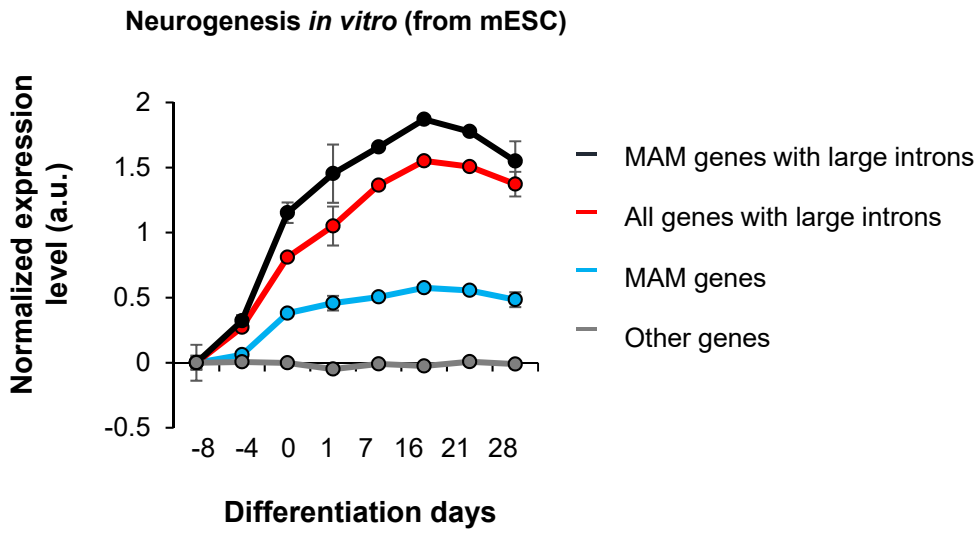

B

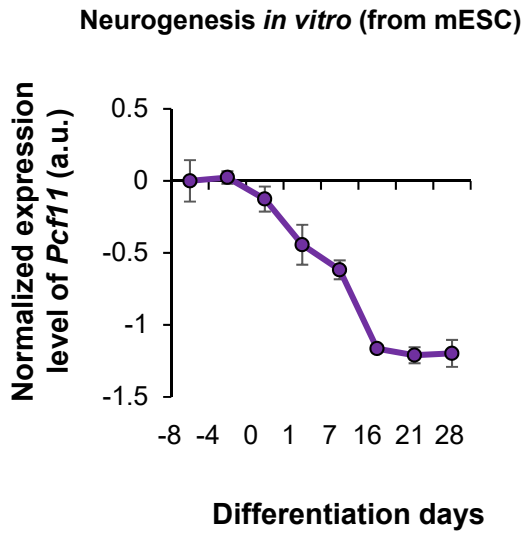

**Figure S4, Related to Figure 4.**

**(A)** Gene expression changes of different gene sets in neurogenesis (*in vitro* differentiation of mouse embryonic stem cells to mature neurons, based on SRP017778).

**(B)** *Pcf11* expression levels in neurogenesis as in (A).

# Figure S5

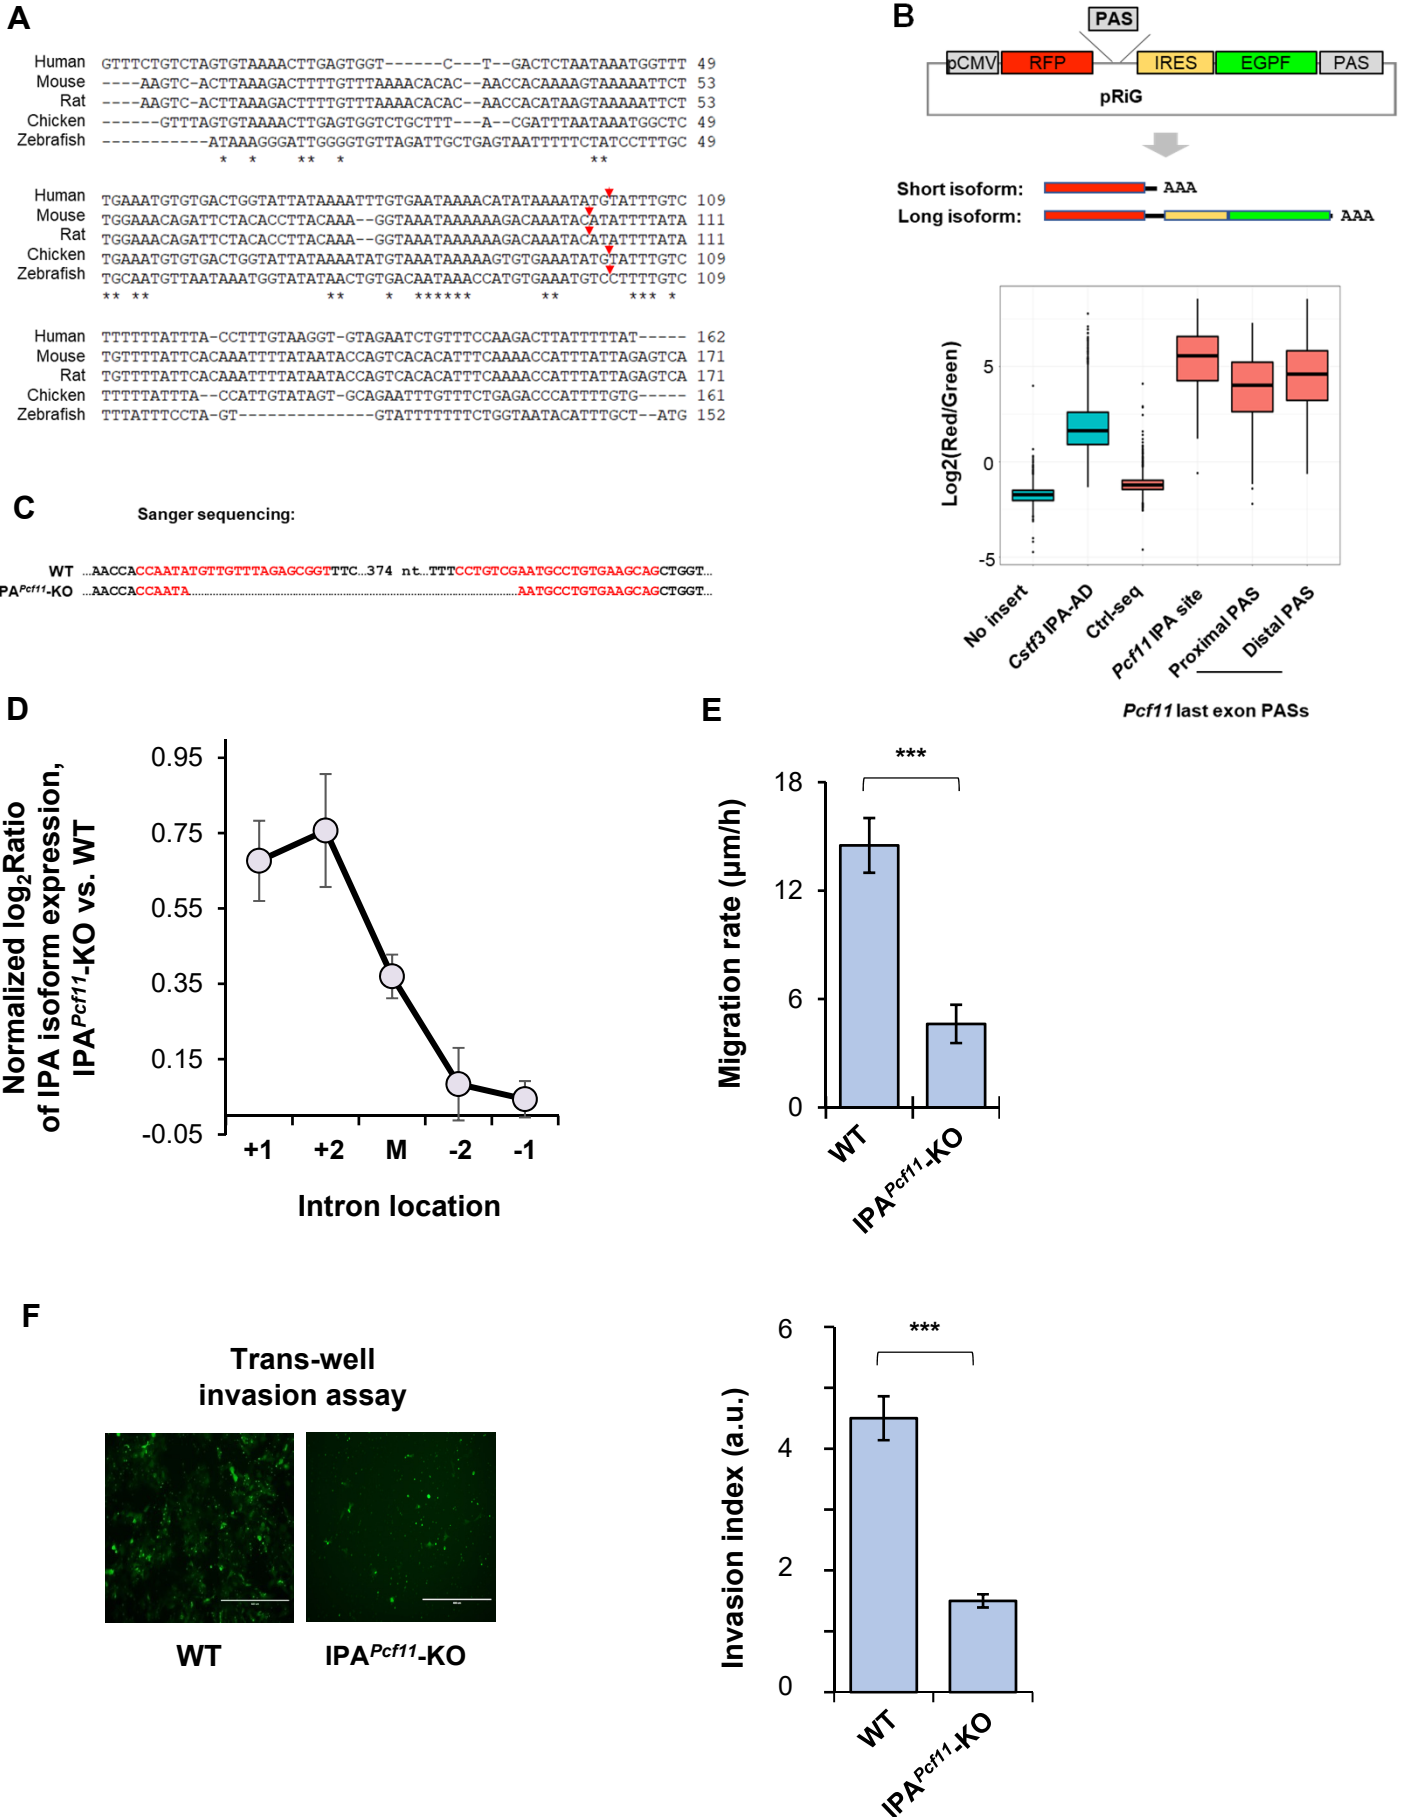

**Figure S5, Related to Figure 6.**

**(A)** Sequence alignment of the region around the IPA of *Pcf11* in five vertebrate species. Arrow indicates PAS annotated in PolyA\_DB.

**(B)** Top, schematic of pRiG and two APA isoforms expressed (short and long isoforms). Bottom, PAS strength analyzed by  $\log_2(\text{red fluorescence signal}/\text{green fluorescence signal})$  or  $\log_2(\text{Red}/\text{Green})$ . A high  $\log_2(\text{Red}/\text{Green})$  value indicates a strong PAS. No insert is pRiG vector only. *Cstf3* IPA-AD is a mutated *Cstf3* IPA site, which is weak. Ctrl-seq is a random sequence from intron 1 of *Pcf11* inserted into pRiG. *Pcf11* proximal and distal PASs are two 3'UTR APA sites in the last exon of *Pcf11*. This result shows that the strength of IPA site is higher than those of PASs in the last exon.

**(C)** Sanger sequencing validation of the amplified PCR products from IPA<sup>*Pcf11*</sup>-KO cells. sgRNA target sequences are highlighted in red.

**(D)** Intron location vs. IPA regulation. +1, +2, M, -2, -1 are first, second, middle, last but one, and last introns, respectively. Error bar is standard error of mean.

**(E)** Scratch assay analysis of cell migration.

**(F)** Trans-well invasion assay. Error bars in (E) & (F) are standard error of mean of ten randomly selected areas. \*\*\*,  $P < 0.01$  (Wilcoxon test).

Figure S6

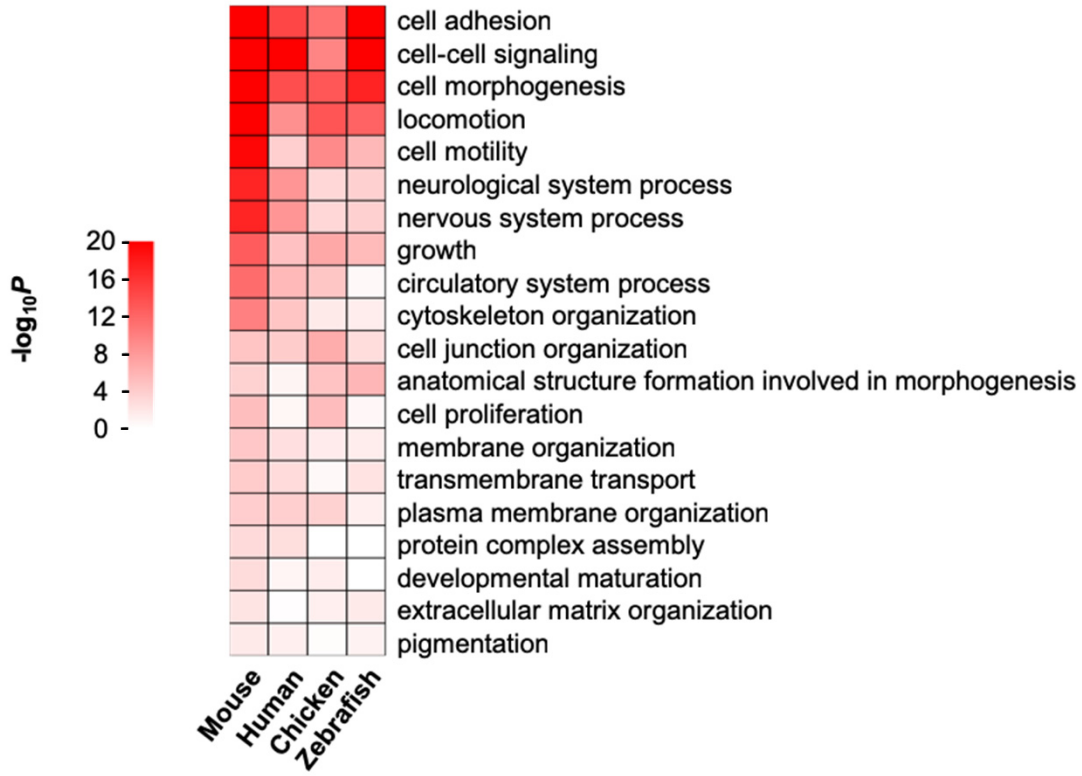

**Figure S6, Related to Figure 7.**

Top GO terms enriched for genes with large introns (top 10%) in several vertebrates. P-value (Fisher's exact test) is based on comparison with other genes in the genome.



Figure S7

A

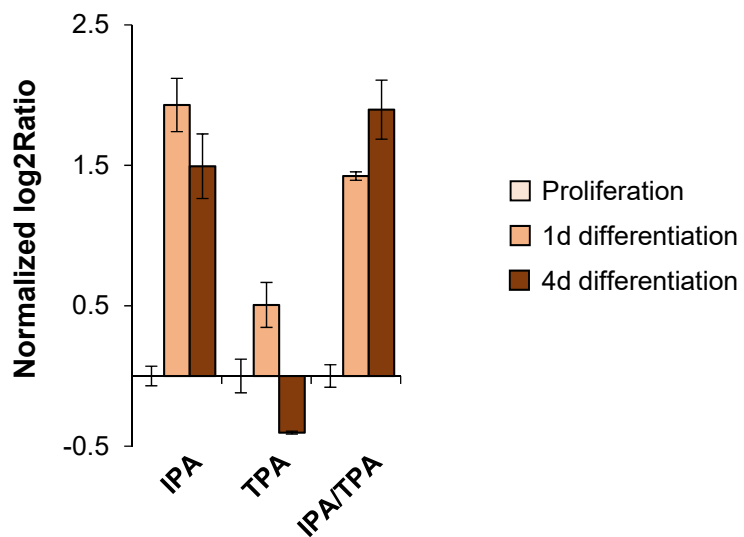

B

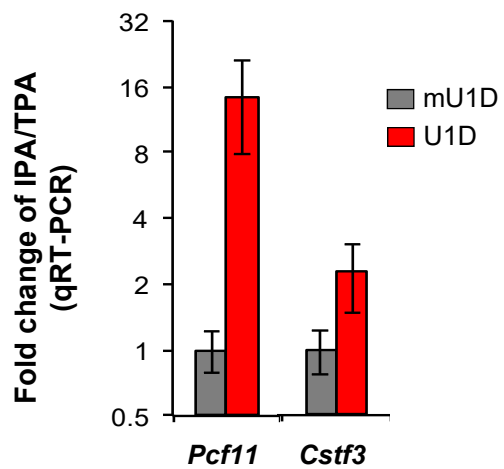

**Figure S7, Related to Figure 7.**

**(A)** RT-qPCR analysis of IPA and TPA isoform expression during C2C12 differentiation.

**(B)** RT-qPCR analysis of IPA and TPA expression in C2C12 cells treated with U1D oligo to functionally inhibit U1. Both *Pcf11* and *Cstf3* IPA events were analyzed. mU1D, mutant U1D oligo (used as a control).
